# Supplementary material
Source: PubMed Central journal article supplement (PMC2527116)
Supplement: supp_M803964200_GorinJBCM708840SupplementalFigS1.pdf [file supp_M803964200_GorinJBCM708840SupplementalFigS1.pdf]

## Supplemental Figure S1

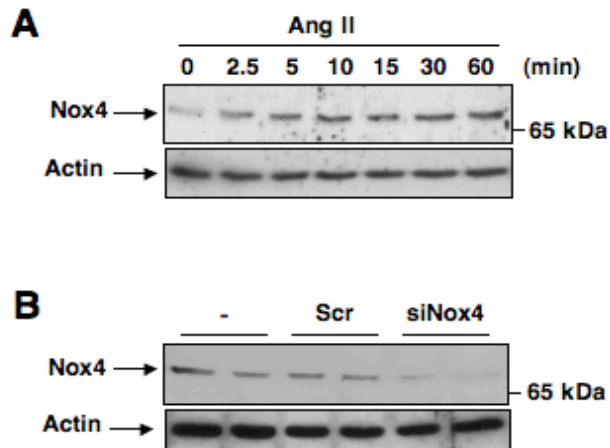

(A) Serum-starved MCs were treated for the indicated time with 1  $\mu$ M Ang II and Nox4 protein expression was evaluated by Western blot analysis using anti-Nox4 antibodies generated in the laboratory (23, 46). (B) MCs were untransfected (-), transfected with non-targeting siRNA (Scr) or siRNA for Nox4 (siNox4). Nox4 protein knockdown with siNox4, but not Scr, was confirmed by Western blot analysis with the same Nox4 antibodies as above. The immunoblots are representative of three independent experiments.
